# Supplementary material
Source: Springer Nature journal article supplement (https://www.springermedizin.de/resource/supplementary/12916_2010_340_MOESM3_ESM.pdf/9599674)

**A**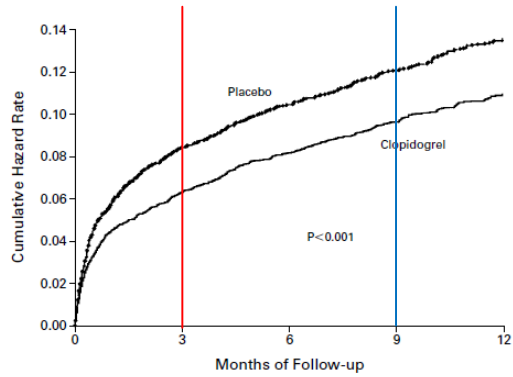

| No. at Risk | 0    | 3    | 6    | 9    | 12   |
|-------------|------|------|------|------|------|
| Placebo     | 6303 | 5780 | 4664 | 3600 | 2388 |
| Clopidogrel | 6259 | 5866 | 4779 | 3644 | 2418 |

**B**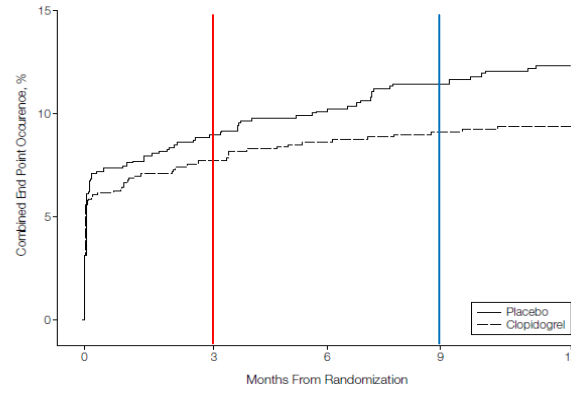

| No. at Risk | 0    | 3   | 6   | 9   | 12  |
|-------------|------|-----|-----|-----|-----|
| Clopidogrel | 1053 | 931 | 920 | 909 | 901 |
| Placebo     | 1063 | 929 | 910 | 881 | 863 |

**C**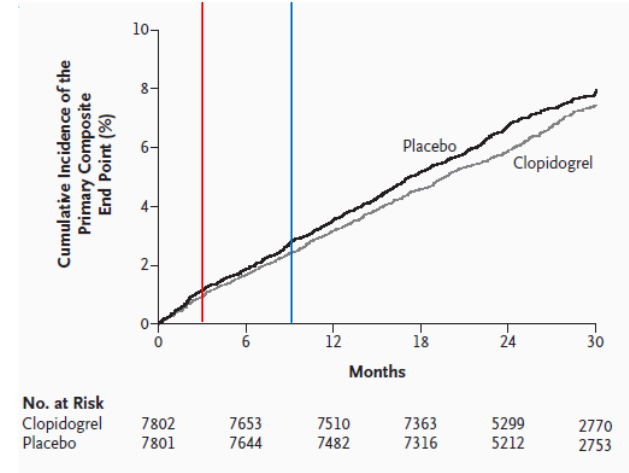

| No. at Risk | 0    | 3    | 6    | 9    | 12   | 18   | 24 | 30 |
|-------------|------|------|------|------|------|------|----|----|
| Clopidogrel | 7802 | 7653 | 7510 | 7363 | 5299 | 2770 |    |    |
| Placebo     | 7801 | 7644 | 7482 | 7316 | 5212 | 2753 |    |    |

**D**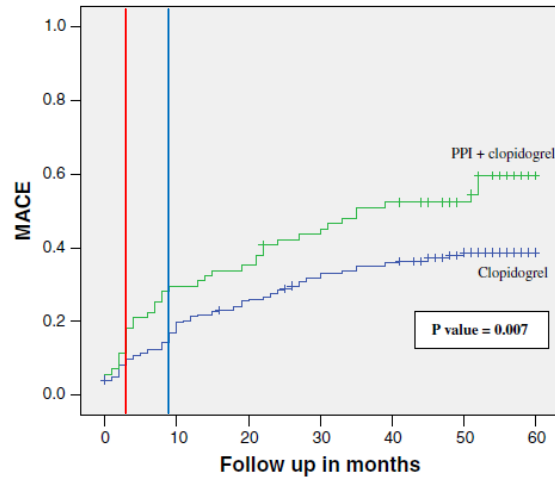**E**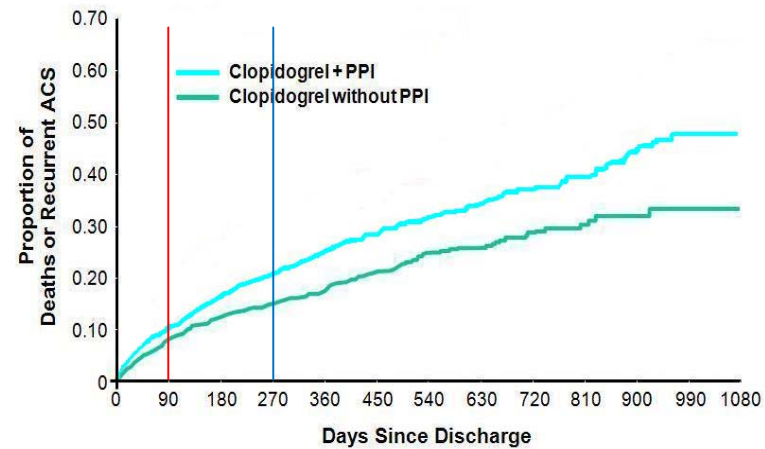

Supplement: MOESM3 [file 9599674]
